# Supplementary material
Source: Springer Nature journal article supplement (https://www.springermedizin.de/resource/supplementary/13000_2011_416_MOESM2_ESM.pdf/9624518)
Supplement: MOESM2 [file 9624518]

|              |                                                             |       |               |
|--------------|-------------------------------------------------------------|-------|---------------|
| ARSD_hsa     | KPNILLIMADDLGTDGLGCGYGNMTRTPNIDQLAAEGVRLTQHLAAAPLCTPSRAAF   | FLTG  | RHSFRSGMIDASX |
| ARSE_hsa     | RPNILLIMADDLGIGDIGYGNMTRTPNIDRLAEDGVRLTQHLAAAPLCTPSRAAF     | FLTG  | RYPYRSGMIVSSI |
| ARSF_hsa     | RPNIVLLIMVDDLGIIGDLGCGYGNMTRTPNIDRLAEDGVRLTQHLAAAPLCTPSRAAF | FLTG  | RYPIRSGMIVSSG |
| STS_mmu      | PPNFLLIMADDLGIGDLGCGYGNMTRTPHDLRLAEGVRLTQHLAAAPLCTPSRAAF    | FLTG  | RYPYRSGMAAHE  |
| STS_rra      | GFNFLLIMADDLGIGDLGCGYGNMTRTPHIDRLALEGVRLTQHLAAAPLCTPSRAAF   | FLTG  | RYPYRSGMASHE  |
| STS_hsa      | RPNIILVADDLGIGDPGCGYGNMTRTPNIDRLASGGVRLTQHLAAAPLCTPSRAAF    | FLTG  | RYPYRSGMASWS  |
| ARSA_bta     | PPNILLIFADDLGYGDLGCGYGNMSTTPNLDQVAAGGLKFTDFYVPSLCTPSRAAF    | LLTG  | RLPVRMGLYPGV  |
| ARSA_ssc     | PPNIVLIFADDLGYGDLGCGYGNMSTTPNLDQVAAGGLRFTDFYVPSLCTPSRAAF    | LLTG  | RLPVRMGLYPGV  |
| ARSA_hsa     | PPNIVLIFADDLGYGDLGCGYGNMSTTPNLDQVAAGGLRFTDFYVPSLCTPSRAAF    | LLTG  | RLPVRMGLYPGV  |
| ARSA_mmu     | PPNILLIFADDLGYGDLGCGYGNMSTTPNLDQVAAGGLRFTDFYVPSLCTPSRAAF    | LLTG  | RLPVRMGLYPGV  |
| KIAA1001_hsa | KPNFVILADDMGWGDLANVAETKDTANLDRMASEGMRVDFHAAASTCSPSRAAF      | LLTG  | RLGLRNGVTR-N  |
| KIAA1001_mmu | KPNFVILADDMGWGDLANVAETKDTANLDRMASEGMRVDFHAAASTCSPSRAAF      | LLTG  | RLGLRNGVTR-N  |
| GALNS_hsa    | RPNILLLLMDDMGWDLGVEPSETPNLDRLMAAEGMLFPFYSANPLCSPSRAAF       | LLTG  | RLPIRNGFYTTN  |
| GALNS_mmu    | PPNIVLLMDDMGWDLGVEPSETPNLDRLMAAEGMLFPFYSANPLCSPSRAAF        | LLTG  | RLPIRNGFYTTN  |
| ARSB_hsa     | PPHLVFLADDLGWNDFVGHG-SKIRTPHDLAALAAAGVLLDNYVTQP-LCTPSRSO    | LLTG  | RYQIRTGLQHQI  |
| ARSB_fca     | PPHLVFLADDLGWNDFVGHG-SKIRTPHDLAALAAAGVLLDNYVTQP-LCTPSRSO    | LLTG  | RYQIRHTGLQHQI |
| ARSB_rra     | PPHLVFLADDLGWNDFVGHG-SKIRTPHDLAALAAAGVLLDNYVTQP-LCTPSRSO    | LLTG  | RYQIRHTGLQHQI |
| Sulfy_hsa    | QPHLIFILADDQGFQDVGYHG-SEIKTPTLDKLAAGVVKLENYYVQP-ICTPSRSO    | FITG  | KYQIRHTGLQHSI |
| Sulfy_mmu    | QPHLIFILADDQGFQDVGYHG-SEIKTPTLDKLAAGVVKLENYYVQP-ICTPSRSO    | FITG  | KYQIRHTGLQHSI |
| Sulf2_hsa    | PPHIIIFILTDQGRYHDFVYHG-SDIETPTLDRLAAAGVVKLENYYIQP-ICTPSRSO  | LLTG  | RYQIRHTGLQHSI |
| Sulf2_mmu    | PPHIIIFILTDQGRYHDFVYHG-SDIETPTLDRLAAAGVVKLENYYIQP-ICTPSRSO  | LLTG  | RYQIRHTGLQHSI |
| SGSH_hsa     | PRNALLLLADDDGGFES-GAYNNSAISTPHLDALARRSLVFRNAFTSVSSCSPSRAAF  | LLTG  | LPQHQNMYGLE   |
| SGSH_clu     | PRNVLLIVADDDGGFES-GAYNNTAISTPHLDALARRSLVFRNAFTSVSSCSPSRAAF  | LLTG  | LPQHQNMYGLE   |
| SGSH_mmu     | SRNVLLIVADDDGGFES-GVYNNTAISTPHLDALARRSLVFRNAFTSVSSCSPSRAAF  | LLTG  | LPQHQNMYGLE   |
| SGSH_bta     | PRNVLLILADDDGGFES-GAYNNSAISTPHLDALARRSLVFRNAFTSVSSCSPSRAAF  | LLTG  | LPQHQNMYGLE   |
| SGSH_ssc     | RRNVLLILADDDGGFES-GAYNNSAISTPHLDALARRSLVFRNAFTSVSSCSPSRAAF  | LLTG  | LPQHQNMYGLE   |
| IDS_hsa      | ALNVLLIIVDDL-RPSLGCYGDKLVRSFNIDQLASHSLLFQNAFAQQAVCAPSRV     | SFLTG | RRPDTTFLYDFN  |
| IDS_mmu      | ALNILLIIVDDL-RPSLGCYGDKLVRSFNIDQLASHSVLFQNAFAQQAVCAPSRV     | SFLTG | RRPDTTFLYDFN  |
| GNS_hsa      | RPNVVLLTDDQD----EVLGGTPLKKTALIGEMGHTFSSAYVPSALCCPSRAAF      | LLTG  | KYPHNHGVVNTN  |
| GNS_chi      | RPNVVLLTDDQD----EVLGGTPLKKTALIGEMGHTFSSAYVPSALCCPSRAAF      | LLTG  | KYPHNHGVVNTN  |
| GNS_mmu      | RPNVVLLTDDQD----AELGGTPLKKTALIGEMGHTFSSAYVPSALCCPSRAAF      | LLTG  | KYPHNHGVVNTN  |
| GNS_rra      | RPNVVLLTDDQD----AELGGTPLKKTALIGEMGHTFSSAYVPSALCYPSSRAAF     | LLTG  | KYPHNHGVVNTN  |
| KIAA1077_hsa | RPNIILVPTDDQD----VELGSLQVMNKRKIMEHGGAFFINAFVTPMCCPSRS       | LLTG  | KYVHNHGVVNTN  |
| KIAA1077_mmu | RPNIILVLTDDQD----VELGSLQVMNKRKIMEHGGAFFINAFVTPMCCPSRS       | LLTG  | KYVHNHGVVNTN  |
| KIAA1077_cco | RPNIILVLTDDQD----VELGSLQVMNKRKIMEHGGAFFINAFVTPMCCPSRS       | LLTG  | KYVHNHGVVNTN  |
| KIAA1247_hsa | RPNIILVLTDDQD----VELGSMQVMNKRRIIMEQGGTHFINAFVTPMCCPSRS      | LLTG  | KYVHNHGVVNTN  |
| KIAA1247_mmu | RPNIILVLTDDQD----VELGSMQVMNKRRIIMEQGGTHFINAFVTPMCCPSRS      | LLTG  | KYVHNHGVVNTN  |
| Sulfx_hsa    | APNVVLVSDSFDGRLTFHPGSSQVVKLPFFINFMTRGTSFLNAYTNSPICPSRAAF    | MSWG  | LFTHLTSWNNF   |
| Sulfx_mmu    | APNVVLVSDSFDGRLTFHPGSSQVVKLPFFINFMRAHGTTFLNAYTNSPICPSRAAF   | MSWG  | LFTHLTSWNNF   |
